# Supplementary material
Source: publisher figshare collection journal article supplement (https://acs.figshare.com/ndownloader/files/4225306)
Supplement: Supplementary file 1 [file 4225306]

# Supporting Information

## **Small Molecule Migration in *Methanosarcina Acetivorans* Protoglobin: Effect of Ligand Binding and Quaternary Structure**

Flavio Forti,<sup>1</sup> Leonardo Boechi,<sup>2</sup> Damian Bikiel,<sup>2</sup> Marcelo A. Martí,<sup>2,3</sup> Marco Nardini,<sup>4</sup>  
Martino Bolognesi,<sup>4</sup> Cristiano Viappiani,<sup>5,6</sup> Darío Estrin<sup>2\*</sup> and F. Javier Luque<sup>1\*</sup>

<sup>1</sup> Departament de Fisicoquímica and Institut de Biomedicina, Facultat de Farmàcia, Universitat de Barcelona, Av. Diagonal 643, E-08028, Barcelona, Spain

<sup>2</sup> Departamento de Química Inorgánica, Analítica, y Química Física, INQUIMAE-CONICET, Facultad de Ciencias Exactas y Naturales, Universidad de Buenos Aires, Ciudad Universitaria, Buenos Aires, Argentina

<sup>3</sup> Departamento de Química Biológica, Facultad de Ciencias Exactas y Naturales, Universidad de Buenos Aires, Ciudad Universitaria, Buenos Aires, Argentina

<sup>4</sup> Dipartimento di Scienze Biomolecolari e Biotecnologie and CIMAINA, Università degli Studi di Milano, I-20131 Milano, Italy

<sup>5</sup> Dipartimento di Fisica, Università degli Studi di Parma, Parma, Italy

<sup>6</sup> NEST, Istituto Nanoscienze-CNR, Italy

\* Send correspondence to [fjluque@ub.edu](mailto:fjluque@ub.edu) or [dario@qi.fcen.uba.ar](mailto:dario@qi.fcen.uba.ar)

**Table S1.** Specific bond angle and torsional parameters (degrees) introduced in the heme unit in order to account for the structural distortion observed in the heme in *MaPgb*.

|             |       |
|-------------|-------|
| NP-FE-NP    | 172.0 |
| NO-FE-NO    | 172.0 |
| X-NO-FE-X   | 0.0   |
| X-NP-FE-X   | 0.0   |
| NP-FE-NO-CC | 150.0 |
| NO-FE-NP-CC | 210.0 |
| HD-CD-CC-NP | 150.0 |
| CC-CD-CC-NP | 150.0 |
| HD-CD-CC-NO | 210.0 |
| CC-CD-CC-NO | 210.0 |

**Figure S1.** Time (ns) evolution of the rmsd ( $\text{\AA}$ ) of the backbone atoms for the core residues (23-189) in the (*left*) deoxygenated and (*right*) oxygenated forms of the protein determined relative to the X-ray crystallographic structures (PDB entries 2VEB and 2VEE). Monomer (MPgb) and dimer (DPgb) species are shown in black and grey, respectively.

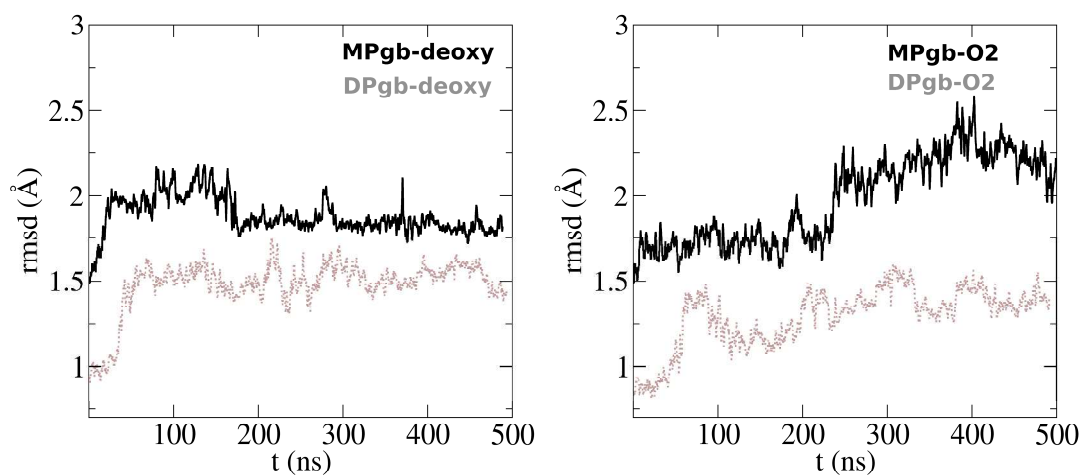

**Figure S2.** Representation of residues Phe(145)G8 (magenta) and Phe(93)E11 (cyan) in the heme cavity of the oxygenated *MaPgb* (PDB code 2VEB). Heme is represented using atom-coloured sticks. O<sub>2</sub> is shown in red spheres.

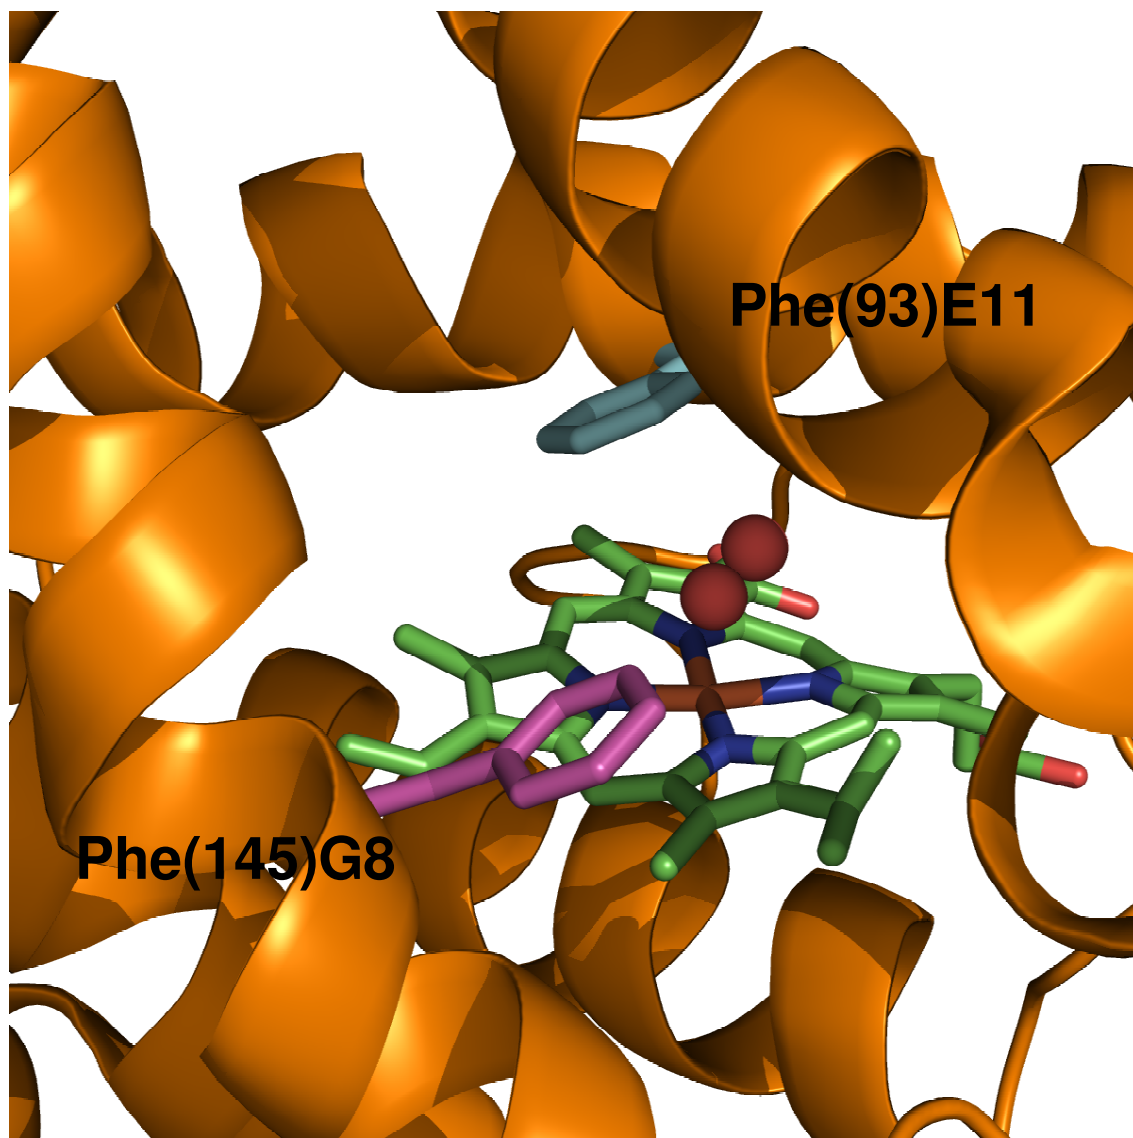

**Figure S3.** Free energy isosurfaces used to delineate tunnels 1 and 2 for (*top*) MPgb-deoxy and (*bottom*) DPgb-O<sub>2</sub>. For MPgb-deoxy the closed conformation of Phe(145)G8, which is the main conformational state, reduces the accessibility through tunnel 1. In contrast, tunnel 1 (enclosed in solid line) is found in both open (left) and closed (right) states depending on the conformation of Phe(145)G8 (shown in yellow) in DPgb-O<sub>2</sub>. Tunnel 2 (enclosed in dashed line) is open in the two cases. Heme is shown as atom-coloured sticks.

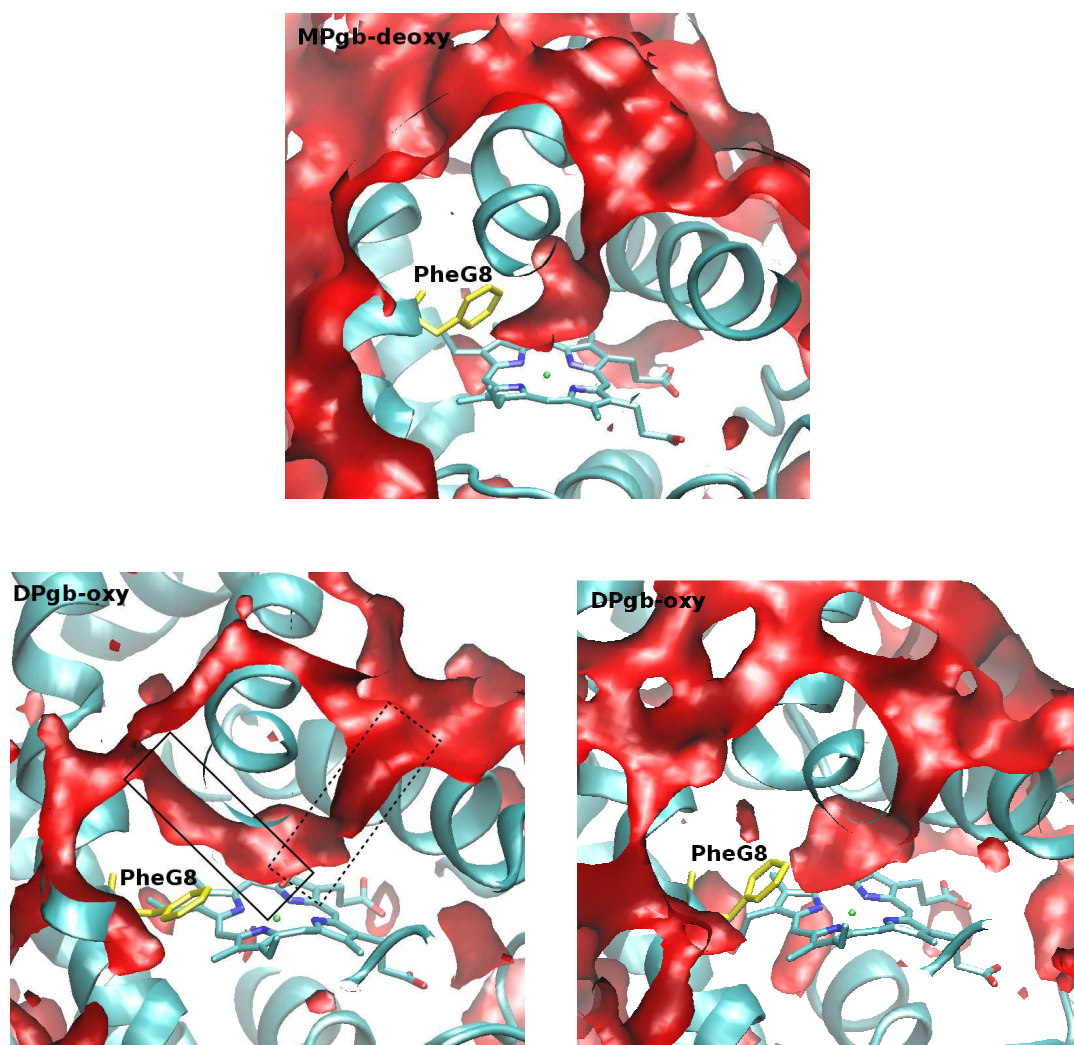

**Figure S4.** Normalized distribution of the dihedral angle (degrees) of Phe(145)G8 side chain in (*top*) the deoxygenated (left) and oxygenated (right) monomer, (*middle*) the two units of the deoxygenated dimer, and (*bottom*) the two units of the oxygenated dimer.

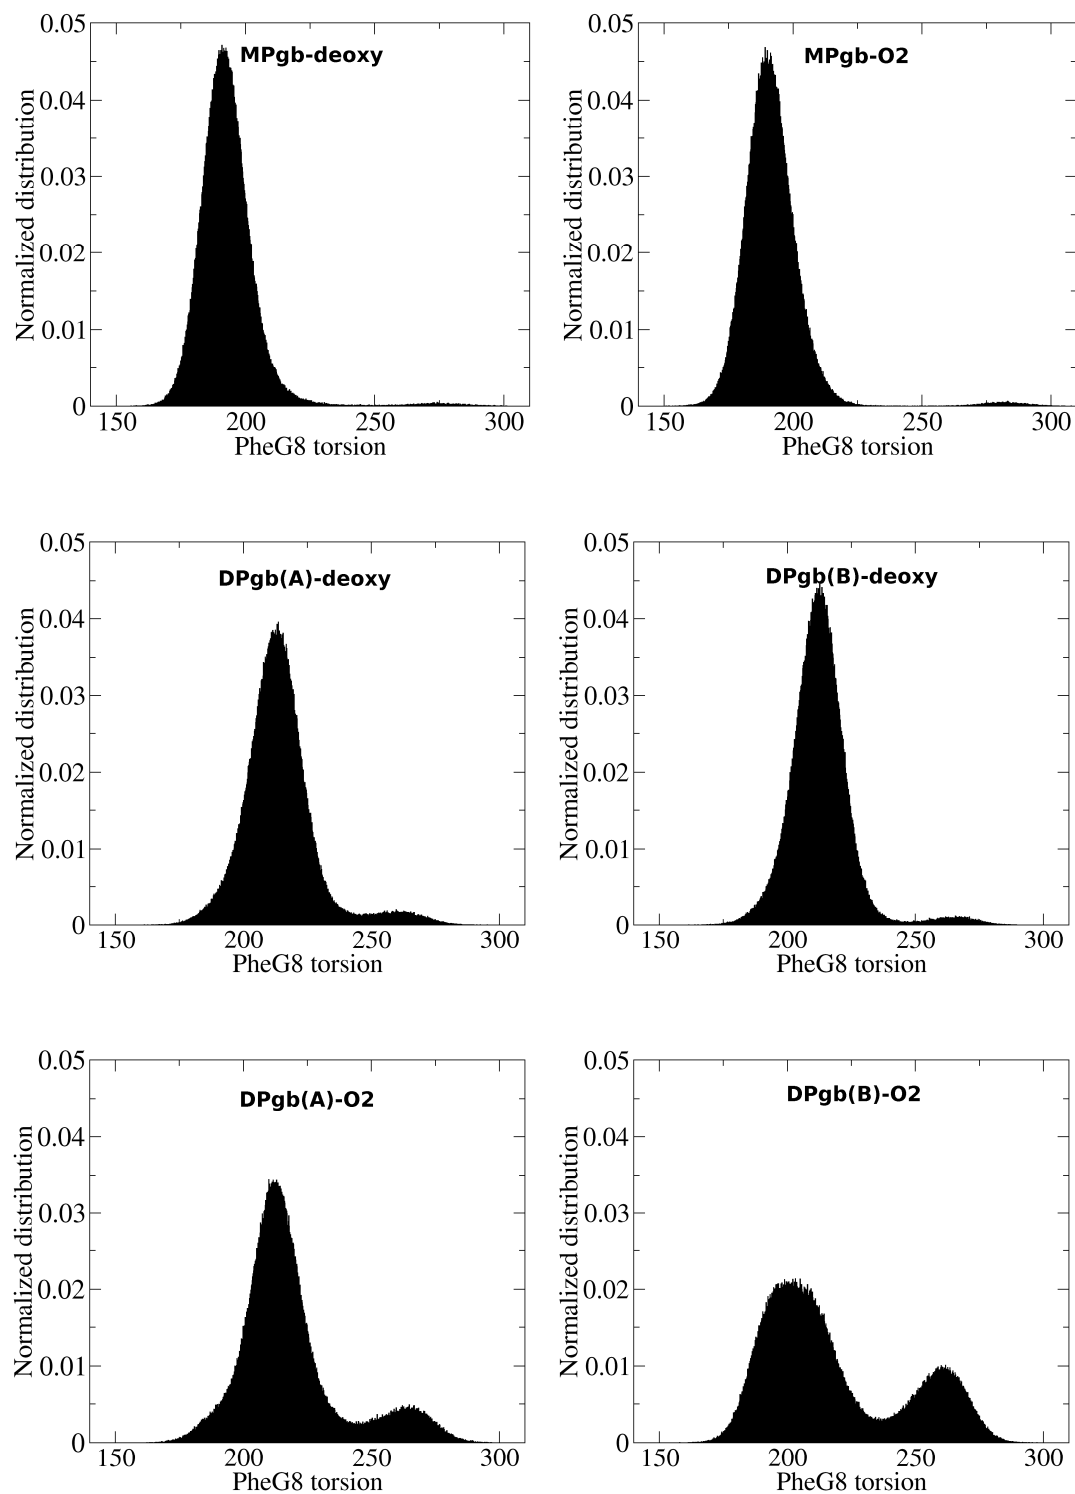

**Figure S5.** Reaction scheme proposed for the CO rebinding kinetics to *MaPgb* (taken from ref. 40), where two distinct conformational forms (*MaPgb<sup>R</sup>* and *MaPgb<sup>T</sup>*) mediate the fast and slow rebinding kinetics. The bound state consists of a mixture of *MaPgb<sup>R</sup>CO* and *MaPgb<sup>T</sup>CO*. After photodissociation, CO can migrate from the primary docking site (*MaPgb<sup>R</sup>:CO*)<sub>1</sub>/*(MaPgb<sup>T</sup>:CO)*<sub>1</sub> to a secondary docking site (*MaPgb<sup>R</sup>:CO*)<sub>2</sub>/*(MaPgb<sup>T</sup>:CO)*<sub>2</sub> or exit to the solvent (*MaPgb<sup>R</sup> + CO*)/(*MaPgb<sup>T</sup> + CO*). Rebinding occurs through two distinct pathways involving either *MaPgb<sup>T</sup>* or *MaPgb<sup>R</sup>*.

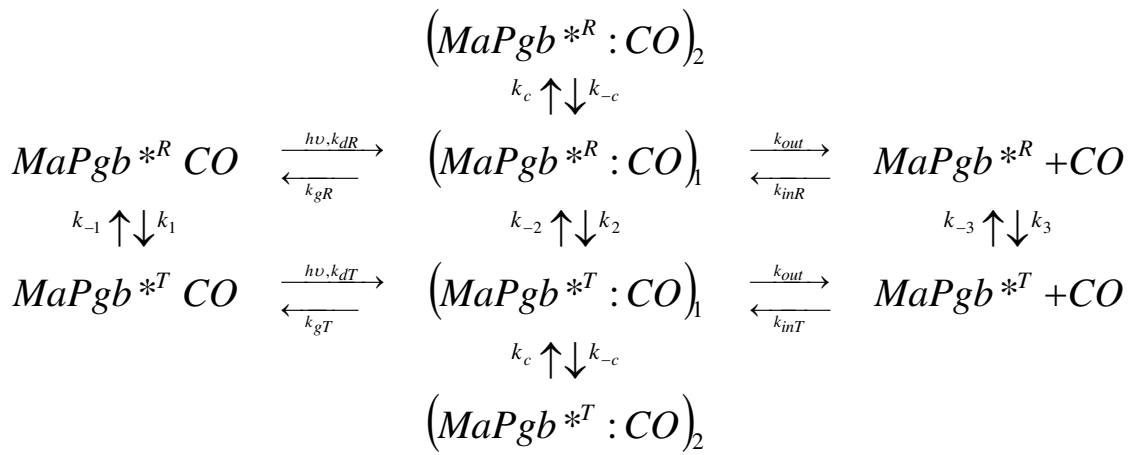

Ligation shifts the equilibrium towards a highly reactive species (*MaPgb<sup>R</sup>*) with high binding kinetics. In the absence of ligand, the protein adopts preferentially a lower reactive conformation (*MaPgb<sup>T</sup>*), with low binding kinetics. Thus, whereas the bound state consists of a mixture of *MaPgb<sup>R</sup>CO* (~77%) and *MaPgb<sup>T</sup>CO* (~23%), as derived from the kinetic constants  $k_1 = 1.35 \cdot 10^5 \text{ s}^{-1}$  and  $k_{-1} = 4.55 \cdot 10^5 \text{ s}^{-1}$ , the reverse situation is found for the unbound state, where *MaPgb<sup>R</sup>* and *MaPgb<sup>T</sup>* populate around 25% and 75%, as derived from the kinetic constants  $k_3 = 6.0 \cdot 10^4 \text{ s}^{-1}$  and  $k_{-3} = 2.0 \cdot 10^4 \text{ s}^{-1}$  (data taken from ref. 40).
